# Supplementary material for: Human-Disease Phenotype Map Derived from PheWAS across 38,682 Individuals
Source: PubMed Central journal article supplement — Am J Hum Genet. 2018 Dec 29;104(1):55–64. doi: 10.1016/j.ajhg.2018.11.006 (PMC6323551; doi:10.1016/j.ajhg.2018.11.006), 2018-12-29
Supplement: mmc1.pdf [file mmc1.pdf]

**The American Journal of Human Genetics, Volume 104**

## **Supplemental Data**

### **Human-Disease Phenotype Map Derived from PheWAS across 38,682 Individuals**

**Anurag Verma, Lisa Bang, Jason E. Miller, Yanfei Zhang, Ming Ta Michael Lee, Yu Zhang, Marta Byrska-Bishop, David J. Carey, Marylyn D. Ritchie, Sarah A. Pendergrass, Dokyoon Kim, and the DiscovEHR Collaboration**

## Supplementary Information

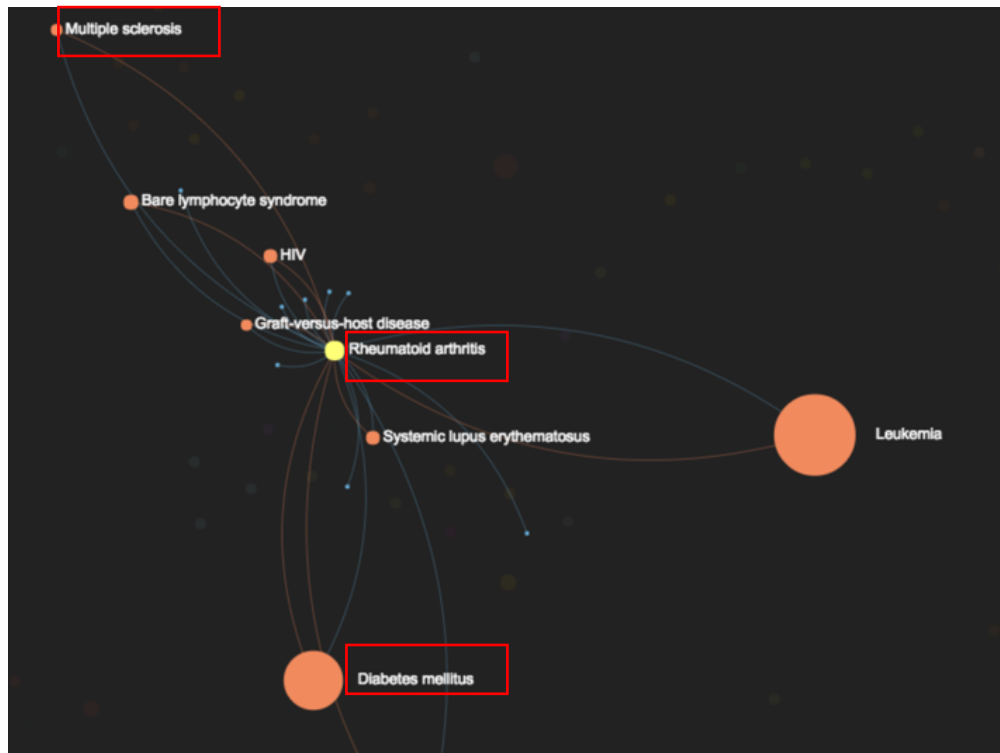

(A)

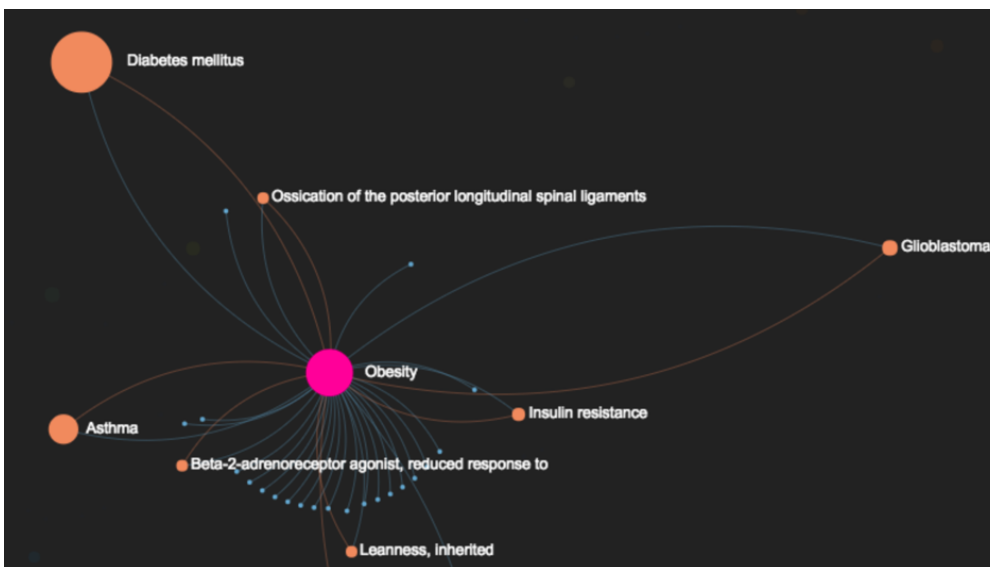

(B)

**Figure S1. Network similarities with human disease network.** (A) The disease connection between the three highlighted autoimmune diseases (Red box) in HDN are same as observed in the DDN. (B) Obesity and its neighboring diseases in HDN and the highlighted red box represent the connections found in our network as well.

| Gene                | Diseases                                                      | Shared SNPs | Known GWAS Associations | Enhancer Region Variants           | Tissues                                                                                                                                          |
|---------------------|---------------------------------------------------------------|-------------|-------------------------|------------------------------------|--------------------------------------------------------------------------------------------------------------------------------------------------|
| <b>PTPN22</b>       | Type 1 Diabetes<br>Multiple sclerosis                         | 1           | Previously Known        | exm85427                           | Breast<br>Dnd41_TCell_Leukemia                                                                                                                   |
| <b>BAG6</b>         | Type 1 Diabetes<br>Multiple sclerosis                         | 1           | Previously Known        | rs760293                           | Adrenal<br>HepG2_Hepatocellular_Carcinoma<br>Liver                                                                                               |
| <b>BTNL2</b>        | Type 1 Diabetes<br>Rheumatoid arthritis                       | 2           | Previously Known        | rs3129953                          | Breast<br>Cervix                                                                                                                                 |
| <b>C2</b>           | Type 1 Diabetes<br>Multiple sclerosis                         | 1           | Novel                   | N/A                                | N/A                                                                                                                                              |
| <b>C6orf10</b>      | Type 1 Diabetes<br>Multiple sclerosis<br>Rheumatoid arthritis | 4           | Previously Known        | N/A                                | N/A                                                                                                                                              |
| <b>CFB</b>          | Type 1 Diabetes<br>Multiple sclerosis                         | 1           | Previously Known        | rs1048709                          | Pancreas<br>Placenta                                                                                                                             |
| <b>HCG20</b>        | Type 1 Diabetes<br>Rheumatoid arthritis                       | 1           | Previously Known        | rs6920124                          | Blood<br>Bone<br>Cervix<br>Dnd41_TCell_Leukemia<br>GI Smooth Muscle<br>HepG2_Hepatocellular_Carcinoma<br>Stromal Connective Stem cells<br>Thymus |
| <b>HCG26</b>        | Type 1 Diabetes<br>Multiple sclerosis                         | 1           | Novel                   | rs2523663                          | Blood<br>Heart<br>Spleen                                                                                                                         |
| <b>HLA-DOB</b>      | Type 1 Diabetes<br>Multiple sclerosis                         | 1           | Previously Known        | rs2071469                          | Placenta<br>Stromal Connective Stem cells                                                                                                        |
| <b>HLA-DQA1</b>     | Type 1 Diabetes<br>Multiple sclerosis                         | 1           | Novel                   | N/A                                | N/A                                                                                                                                              |
| <b>HLA-DQA2</b>     | Type 1 Diabetes<br>Multiple sclerosis                         | 1           | Previously Known        | N/A                                | N/A                                                                                                                                              |
| <b>HLA-DQB1</b>     | Type 1 Diabetes<br>Multiple sclerosis                         | 1           | Novel                   | N/A                                | N/A                                                                                                                                              |
| <b>HLA-DRA</b>      | Type 1 Diabetes<br>Multiple sclerosis                         | 1           | Previously Known        | N/A                                | N/A                                                                                                                                              |
| <b>LOC101929072</b> | Type 1 Diabetes<br>Rheumatoid arthritis                       | 1           | Previously Known        | rs2251396                          | A549_EtOH_0.02pct_Lung_Carcinoma<br>Blood<br>Bone<br>Breast<br>Dnd41_TCell_Leukemia<br>Fat Skin (Adipose Tissue)                                 |
| <b>LOC102725019</b> | Type 1 Diabetes<br>Multiple sclerosis                         | 1           | Previously Known        | N/A                                | N/A                                                                                                                                              |
| <b>NOTCH4</b>       | Type 1 Diabetes<br>Multiple sclerosis                         | 2           | Previously Known        | N/A                                | N/A                                                                                                                                              |
| <b>PSMB8</b>        | Type 1 Diabetes<br>Multiple sclerosis                         | 1           | Novel                   | N/A                                | N/A                                                                                                                                              |
| <b>TAP1</b>         | Type 1 Diabetes<br>Multiple sclerosis                         | 1           | Previously Known        | rs3198005                          | Breast<br>Cervix                                                                                                                                 |
| <b>TAP2</b>         | Type 1 Diabetes<br>Multiple sclerosis<br>Rheumatoid arthritis | 5           | Previously Known        | rs3819721<br>rs241426<br>rs3819714 | Blood<br>Breast<br>Dnd41_TCell_Leukemia<br>HepG2_Hepatocellular_Carcinoma<br>Placenta<br>Thymus<br>Cervix                                        |

**Table S2.** Shared SNPs between disease network. Here we present all the SNPs shared between key hub nodes in the network i.e. Type 1 Diabetes, Multiple Sclerosis, and Rheumatoid Arthritis.

| <b>Gene ontology term</b>                                  | <b>p-value</b>       | <b>FDR q-value</b>   |
|------------------------------------------------------------|----------------------|----------------------|
| Antigen processing and presentation ion of peptide antigen | 9.74e <sup>-16</sup> | 5.76e <sup>-12</sup> |
| MHC class II receptor activity                             | 2.87e <sup>-15</sup> | 6.47e <sup>-12</sup> |
| Immune system process                                      | 3.53e <sup>-15</sup> | 6.47e <sup>-12</sup> |
| Antigen processing and presentation                        | 4.38e <sup>-15</sup> | 6.47e <sup>-12</sup> |
| MHC class II protein complex                               | 1.58e <sup>-14</sup> | 1.87e <sup>-11</sup> |
| Positive regulation of immune system process               | 9.36e <sup>-14</sup> | 9.23e <sup>-11</sup> |
| Regulation of immune system process                        | 2.16e <sup>-13</sup> | 1.83e <sup>-10</sup> |
| MHC protein complex                                        | 2.91e <sup>-13</sup> | 2.15e <sup>-10</sup> |
| Immune response                                            | 9.9e <sup>-13</sup>  | 6.51e <sup>-10</sup> |
| Regulation of immune resonance                             | 5.62e <sup>-12</sup> | 3.33e <sup>-9</sup>  |

**Table S3.** Gene Ontology enrichment analysis using shared genes between Type 1 Diabetes, Multiple Sclerosis, and Rheumatoid Arthritis. P-values were obtained from the hypergeometric distribution
